# Supplementary material for: Selective enrichment of damaged DNA molecules for ancient genome sequencing
Source: HighWire-hosted journal article supplement (doi:10.1101/gr.174201.114), 2014-07-31
Supplement: Supplemental_Table1.xlsx [file Supplemental_Table1.xlsx]

## Sheet: Sheet1
DNA extraction and library preparation										shotung sequencing																mtDNA enrichment
										Summary statistics												Coverage of the nuclear genome that could be obtained by using up 100 mg bone material (based on qPCR molecule counts and the results of shotgun sequencing)				Summary statistics
Experiment	Sample	bone material used in extraction [mg]	DNA Extraxt ID	Library preparation protocol	Fraction of extract used for library preparation	Excision of internal uracils by E.coli UDG treatment	Library ID	Library fraction	estimated number of molecules (qPCR count) *	Sequencing run ID	Total number of sequences	Number of sequences >=35bp & overlap-merged	Number of mapped sequences >=35bp	Number of unique sequences >=35bp	Fraction of mapped sequences (>=35bp) [%]	5' C to T substitution frequency †	3' C to T substitution frequency †	Unique sequences with C to T substitutions	Fraction of unique sequences with C to T substitution [%]	Unique sequences with terminal C to T substitutions §	Fraction of unique sequences with terminal C to T substitution [%] §	Average length of mapped sequences	Average length of unique sequences with terminal C to T substitutions	Predicted genomic coverage (all sequences)	Predicted genomic coverage (sequences with terminal C to T substitutions only §)	Sequencing RunID	Total number of sequences	Number of sequences >=35bp & overlap-merged	Number of mapped sequences >=35bp	Number of unique sequences >=35bp	5' C to T substitution frequency †	3' C to T substitution frequency †	Unique sequences with C to T substitutions ‡	Fraction of unique sequences with C to T substitution [%]	Present-day human contamination [%] (95% C.I.)	Present-day human contamination, sequences with C to T substitution only [%] (95% C.I.) §
Mezmaiskaya	Mezmaiskaya 1	107.2	E734	standard	0.05	yes	B9687	-	2600000000	130613	794044	374736	37268	37241	9.94513	10.8868	19.8696	3772	10.1286	2362	6.34247	57.56	47.63	43.6817	2.29255	130703	310744	205395	113013	29137	8.315	13.9797	1571	5.39177	43.8 (42.7-44.9)	5.9 (3.8-8.9)
	Mezmaiskaya 1	90	E737	standard	0.05	yes	B9688	-	2400000000	130613	737110	336624	38597	38581	11.4659	12.3354	20.7089	3921	10.163	2593	6.72092	56.5	48.06	52.5953	3.00685	130703	277342	181609	102985	28771	8.02242	12.7585	1435	4.98766	50.0 (48.9-51.2)	8.1 (5.5-11.7)
	Extraction blank	-	E833	standard	0.05	yes	B9691	-	20000000	130613	125520	33862	406	389	1.19898	0	0	9	2.31362	1	0.257069	56.92	68			130703	41131	19577	8680	104	0	0	0	0
	Library blank	-	-	standard		yes	B9694	-	13000000	130613	236031	53618	431	390	0.803835	2.66667	0	22	5.64103	3	0.769231	54.05	50.33			130703	37832	13825	4115	50	0	0	0	0
	CL103	-	-	standard		no	B9692	-	5500000000
	CL104	-	-	standard		yes	B9693	-	6100000000
	Mezmaiskaya 1	107.2	E734	U selection	0.05	yes	B9695	SN	150000000	130613	1174326	646769	64868	64749	10.0295	65.3534	75.8809	41772	64.5137	37465	57.8619	53.04	47.15	2.73307	1.40579	130703	279287	204155	112362	17177	58.5342	71.1126	9661	56.2438	26.8 (25.3-28.3)	2.2 (1.6-3.0)
	Mezmaiskaya 1	90	E737	U selection	0.05	yes	B9696	SN	110000000	130613	1172775	593951	81385	81157	13.7023	67.199	79.26	56283	69.3508	51271	63.1751	50.99	46.86	2.88319	1.67393	130703	292052	207154	115098	16367	57.3126	70.3852	9056	55.3308	30.7 (29.1-32.4)	3.3 (2.5-4.3)
	Extraction blank	-	E833	U selection	0.05	yes	B9699	SN	380000	130613	10908	4329	53	50	1.2243	0	23.5294	13	26	6	12	52.4	39.67			130703	25954	15943	4429	3	0	0	0	0
	Library blank	-	-	U selection	0.05	yes	B9702	SN	410000	130613	5500	1871	19	19	1.0155	0	0	5	26.3158	0	0	53				130703	30919	16269	2148	1	0	0	0	0
	CL103	-	-	U selection		no	B9700	SN	3100000000
	CL104	-	-	U selection		yes	B9701	SN	93000000
	Mezmaiskaya 1	107.2	E734	U selection	0.05	yes	B9703	beads	1400000000	130613	895256	506631	49704	49667	9.81069	2.02242	2.39601	1738	3.49931	387	0.779189	58.18	51.49	28.1229	0.193933	130703	268996	195704	102003	27848	1.96599	2.09105	288	1.03419	42.3 (41.2-43.5)	1.9 (0.3-10.1)
	Mezmaiskaya 1	90	E737	U selection	0.05	yes	B9704	beads	1200000000	130613	952130	507187	58274	58228	11.4896	2.43101	2.05663	2013	3.4571	466	0.800302	57.03	51.1	31.0263	0.222485	130703	366372	261943	146591	29786	1.83609	1.79523	271	0.909823	47.5 (46.4-48.7)	1.7 (0.3-9.0)
	Extraction blank	-	E833	U selection	0.05	yes	B9707	beads	15000000	130613	144337	30076	397	369	1.31999	0	1.42857	9	2.43902	2	0.542005	56.18	36.5			130703	33477	16785	8496	93	0	0	0	0
	Library blank	-	-	U selection		yes	B9710	beads	9200000	130613	133395	22152	193	176	0.871253	0	0	8	4.54545	0	0	51.25				130703	34963	12771	8015	13	0	0	0	0
	CL103	-	-	U selection		no	B9708	beads	570000000
	CL104	-	-	U selection		yes	B9709	beads	4300000000
Vindija and El Sidron	Vindija 33.17	43	E1591	U selection	0.2	yes	B9746	SN	460000000	130620	373764	217706	6471	6468	2.97236	76.7851	86.4381	5473	84.6166	5305	82.0192	48.32	48.35	1.49155	1.22412	130703	330411	213907	95783	16217	78.0345	87.9867	14271	88.0002	0.4 (0.2-0-8)	0.1 (0-0.3)
	Vindija 33.19	58	E1592	U selection	0.2	yes	B9747	SN	550000000	130620	548927	266856	40218	40183	15.071	74.6695	83.8368	34035	84.7	32677	81.3205	50.62	50.88	5.86154	4.79111	130703	328185	201270	99153	16799	78.1442	86.6289	14573	86.7492	1.2 (0.8-1.7)	0.8 (0.5-1.4)
	Vindija 33.17	43	E1591	U selection	0.2	no	B9748	SN	1800000000	130620	369931	242704	7005	7002	2.88623	59.0793	65.256	6406	91.4881	2526	36.0754	51.68	50.3	6.82752	2.39728	130703	320219	244335	89731	22998	58.6239	69.0083	22160	96.3562	0.5 (0.3-0.8)	0.3 (0.1-0.7)
	Sidron 1253	45	E1593	U selection	0.2	yes	B9749	SN	19000000000	130620	418731	239468	361	361	0.150751	79.8851	89.3939	320	88.6427	308	85.3186	46.75	46.91	2.83624	2.42812	130703	320016	215328	43207	15773	83.1123	91.8805	14311	90.731	0.4 (0.2-0.8)	0.3 (0.1-0.7)
	Sidron 1253	45	E1593	U selection	0.2	no	B9751	SN	41000000000	130620	677757	455447	791	791	0.173676	66.6667	82.0652	711	89.8862	380	48.0405	49.45	49.29	8.76373	4.19651	130703	290822	220093	45128	19211	72.1225	81.1881	18507	96.3354	0.3 (0.2-0.6)	0.4 (0.1-0.9)
	Extraction blank	-	E1595	U selection	0.2	no	B9758	SN	1500000	130620	53581	21495	2500	2480	11.6306	6.33803	8.63309	1300	52.4194	154	6.20968	47.89	44.06			130703	31617	17906	11355	177	5.55556	17.8571	11	6.21469
	Library blank	-	-	U selection		no	B9761	SN	410000	130620	6446	2185	23	23	1.05263	0	0	5	21.7391	2	8.69565	48.7	43.5			130703	33117	15227	3523	2	0	0	0	0
	CL103	-	-	U selection		no	B9759	SN	2800000000
	CL104	-	-	U selection		no	B9760	SN	180000000
	Vindija 33.17	43	E1591	U selection	0.2	yes	B9762	beads	10000000000	130620	571278	364192	1936	1936	0.531588	7.40741	5.69948	111	2.01446	39	2.01446	48.68	51.36	6.39424	0.135901	130703	250639	175971	39460	16661	6.60033	3.85996	560	3.36114	1.1 (0.8-1.6)	0 (0-7.1)
	Vindija 33.19	58	E1592	U selection	0.2	yes	B9763	beads	6500000000	130620	627638	362560	12018	12010	3.31476	5.48327	6.69923	630	1.94838	234	1.94838	50.86	53.35	18.19	0.371761	130703	257504	159040	47484	18680	6.54918	3.69588	717	3.83833	3.1 (2.5-3.8)	0 (0-6.1)
	Vindija 33.17	43	E1591	U selection	0.2	no	B9764	beads	9300000000	130620	631367	377257	2183	2181	0.578651	7.80781	12.1359	200	9.17011	57	2.61348	48.04	50.47	5.9874	0.164395	130703	256603	174680	39165	16090	11.0359	4.85133	2891	17.9677	1.5 (1.1-2.0)	1.4 (0.2-7.5)
	Sidron 1253	45	E1593	U selection	0.2	yes	B9765	beads	58000000000	130620	629872	379510	542	542	0.142816	14.6067	5.88235	41	2.95203	16	2.95203	46.6	43	8.61385	0.234639	130703	295582	199556	33688	17050	11.2224	5.06722	772	4.52786	0.5 (0.2-0.8)	1.9 (0.3-9.8)
	Sidron 1253	45	E1593	U selection	0.2	no	B9767	beads	79000000000	130620	839625	522916	711	711	0.135968	20	7.8125	85	11.955	32	4.5007	47.45	44.88	11.7567	0.500473	130703	330769	229248	33427	17009	23.2499	7.29499	3216	18.9076	0.7 (0.4-1.2)	2.5 (0.7-8.6)
	Extraction blank	-	E1595	U selection	0.2	no	B9774	beads	25000000	130620	115673	27155	3948	3940	14.5388	0.362319	0.534759	95	2.41117	12	0.304569	46.37	48.67			130703	45645	18447	12858	2372	1.59363	0.987654	110	4.63744
	Library blank	-	-	U selection		no	B9777	beads	10000000	130620	142402	30288	249	221	0.822108	0	0	3	1.35747	0	0	50.13				130703	44645	17629	8437	38	0	0	1	2.5641
	CL103	-	-	U selection		no	B9775	beads	440000000
	CL104	-	-	U selection		no	B9776	beads	3800000000
	* qPCR counts are normalized for the number of library molecules produced from a single template strand (2 in the supernatant library fraction and 1 in the bead fraction)
	† Numbers are italicized if based on fewer than 100 observations
	‡ For UDG-treated libraries, only 5' and 3' terminal and 3' penultimate C to T differences were counted
	§ Sequences were filtered for C to T differences at the 5' and 3' terminal positions as well as the 3' penultimate position
